# Supplementary material for: Visible label-free detection of bacterial DNA using flocculation of sterically stabilised cationic latexes
Source: PubMed Central journal article supplement (PMC10155078; doi:10.1039/d2tb02714c), 2023-03-14
Supplement: TB-011-D2TB02714C-s001.pdf [file TB-011-D2TB02714C-s001.pdf]

*Electronic Supporting Information for:*

## **Visible label-free detection of bacterial DNA using flocculation of sterically stabilised cationic latexes**

*Elisabeth Trinh<sup>a</sup>, Kate L. Thompson<sup>a</sup>, Shang-Pin Wen<sup>a</sup>, Gavin J. Humphreys<sup>b</sup>,  
Bianca L. Price<sup>b, c</sup>, Lee A. Fielding<sup>a, d, \*</sup>*

- a. Department of Materials, School of Natural Sciences, The University of Manchester, Oxford Road, Manchester, M13 9PL, UK.*
- b. Division of Pharmacy and Optometry, School of Health Sciences, Faculty of Biology Medicine and Health, The University of Manchester, Oxford Road, Manchester, M13 9PT, UK.*
- c. Division of Pharmacy and Optometry, Lydia Becker Institution of Immunology and Inflammation, Faculty of Biology Medicine and Health, The University of Manchester, Oxford Road, Manchester, M13 9PT, UK.*
- d. Henry Royce Institute, The University of Manchester, Oxford Road, Manchester, M13 9PL, UK.*

*\* lee.fielding@manchester.ac.uk*

### **Materials and additional experimental methods**

#### **Materials**

2-Vinylpyridine (97%, 2VP; Sigma-Aldrich, UK), divinylbenzene (80 mol % 1,4-divinyl content, DVB; Sigma-Aldrich, UK) and benzyl methacrylate (BzMA, 98%, Sigma-Aldrich, UK) were passed through a column of activated basic alumina to remove inhibitors and impurities before use. Hexadecane (HD, 99%) was purchased from Alfa Aesar (UK). Diethyl ether (99%), azobisisobutyronitrile (AIBN, 98%), and 2,2'-azodiisobutyramidine dihydrochloride (AIBA; 97%) were purchased from Sigma-Aldrich (UK) and used as received. Aliquat 336 surfactant was purchased from Fisher Scientific (UK) and used as received. Lutensol TO 20, which is a saturated iso-C13 alcohol with an ethoxylation block length of 20 units was obtained from BASF (Germany) and used as received. Poly(ethylene glycol) methyl ether methacrylate (PEGMA, average  $M_n$  2,000 g mol<sup>-1</sup>, Sigma-Aldrich, UK) was supplied as a 50 wt. % solution in H<sub>2</sub>O. PEGMA with an average  $M_n$  360 g mol<sup>-1</sup> and average  $M_n$  500 g mol<sup>-1</sup> (Sigma Aldrich, UK) were passed through a basic alumina column to remove inhibitors before use. Bis-(2-phenylethanesulfanyl thiocarbonyl) disulphide (PETTCCP) was prepared in-house using previously published methods.<sup>1</sup> Deionised water was used throughout this study for analysis and dilution. PCR reagents were used as received. DNA extraction and purification kits (Qiagen, UK) were used as per manufacturer's instructions.

#### **Preparation of poly(benzyl methacrylate) by RAFT miniemulsion polymerisation**

The synthesis of poly(benzyl methacrylate) with a mean degree of polymerisation of 200 (DP) *via* reversible addition–fragmentation chain transfer (RAFT) miniemulsion polymerisation was conducted at a dispersed phase content of 20 % w/w, as previously reported.<sup>2</sup> BzMA (7.8 g, 44.087 mmol); PETTCCP (41.4 mg, 0.147 mmol); AIBN (4.8 mg, 0.029 mmol, [Chain Transfer Agent (CTA)]/[initiator] = 5); Lutensol TO 20 (604.0 mg, 7.8% w/w related to BzMA); HD (185.2 mg, 2.4% w/w related to BzMA); and water (31.4 g) were used. The reactor contents were deoxygenated by purging with nitrogen for 10 min at room temperature. After deoxygenation, the round-bottomed flask was immersed into a preheated oil bath at 70 °C for 240 min. Polymerisations were quenched by cooling to room temperature and exposing to air.

### **Preparation of poly(4-styrene sulfonate)-block-poly(benzyl methacrylate) (PSS-*b*-PBzMA) diblock copolymer nanoparticles *via* RAFT mediated polymerisation-induced self-assembly (PISA)**

Previous work on the synthesis of these diblock copolymer nanoparticles has been described previously.<sup>1</sup> PSS<sub>54</sub>-*b*-PBzMA<sub>100</sub> latexes were synthesised at 70 °C for 24 hr using PSS<sub>54</sub> macro-CTA (85.2 mg, 0.012 mmol), BzMA (215.3 mg, 1.22 mmol), ACVA (1.1 mg, 0.004 mmol, CTA/initiator molar ratio = 3) in an 80 % methanol/water mixture. Polymerisations were quenched by cooling to room temperature and exposing to air.

### **Synthesis of poly(2-vinyl pyridine)-block-poly(benzyl methacrylate) P2VP-*b*-PBzMA diblock copolymer nanoparticles *via* RAFT emulsion polymerisation**

Previous work on the synthesis of these diblock copolymer nanoparticles has been described previously.<sup>3</sup> P2VP<sub>32</sub>-PBzMA<sub>300</sub> was synthesised in water at pH 2, using P2VP<sub>32</sub> macro-CTA (32.3 mg, 0.009 mmol), AIBA (0.8 mg, 0.003 mmol, CTA/initiator molar ratio = 3), and deionised water. The solution pH was slowly adjusted to pH 2 using an aqueous solution of 0.1 M HCl, and then BzMA (467.7 mg, 2.654 mmol) was added. The vial was sealed and deoxygenated by purging nitrogen for 10 min before being placed in a preheated oil bath at 70 °C for 24 h to ensure complete conversion of BzMA. Polymerisations were quenched by cooling to room temperature and exposing to air.

## Supporting Figures

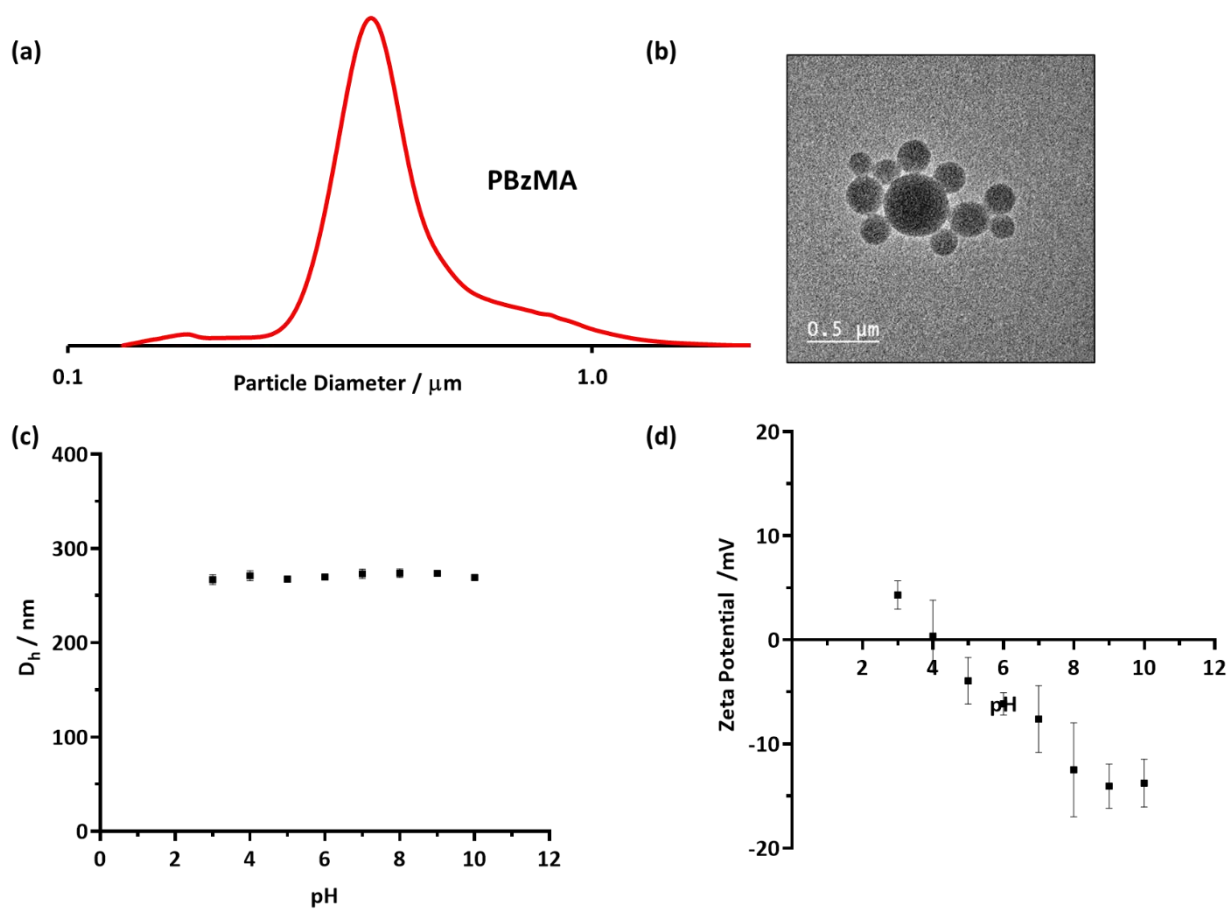

**Figure S1.** Characterisation of non-ionic PBzMA latex particles prepared by miniemulsion polymerisation. (a) Disc Centrifuge Photosedimentometry (DCP) particle size distributions were calculated using a particle density of  $1.18 \text{ g cm}^{-3}$ . (b) Representative TEM image. (c) Mean hydrodynamic diameter and (d) zeta potential as a function of pH. Measurements were conducted at a latex concentration of approximately 0.01 % w/w with 1 mM KCl as a background electrolyte. The pH was adjusted using KOH and HCl.

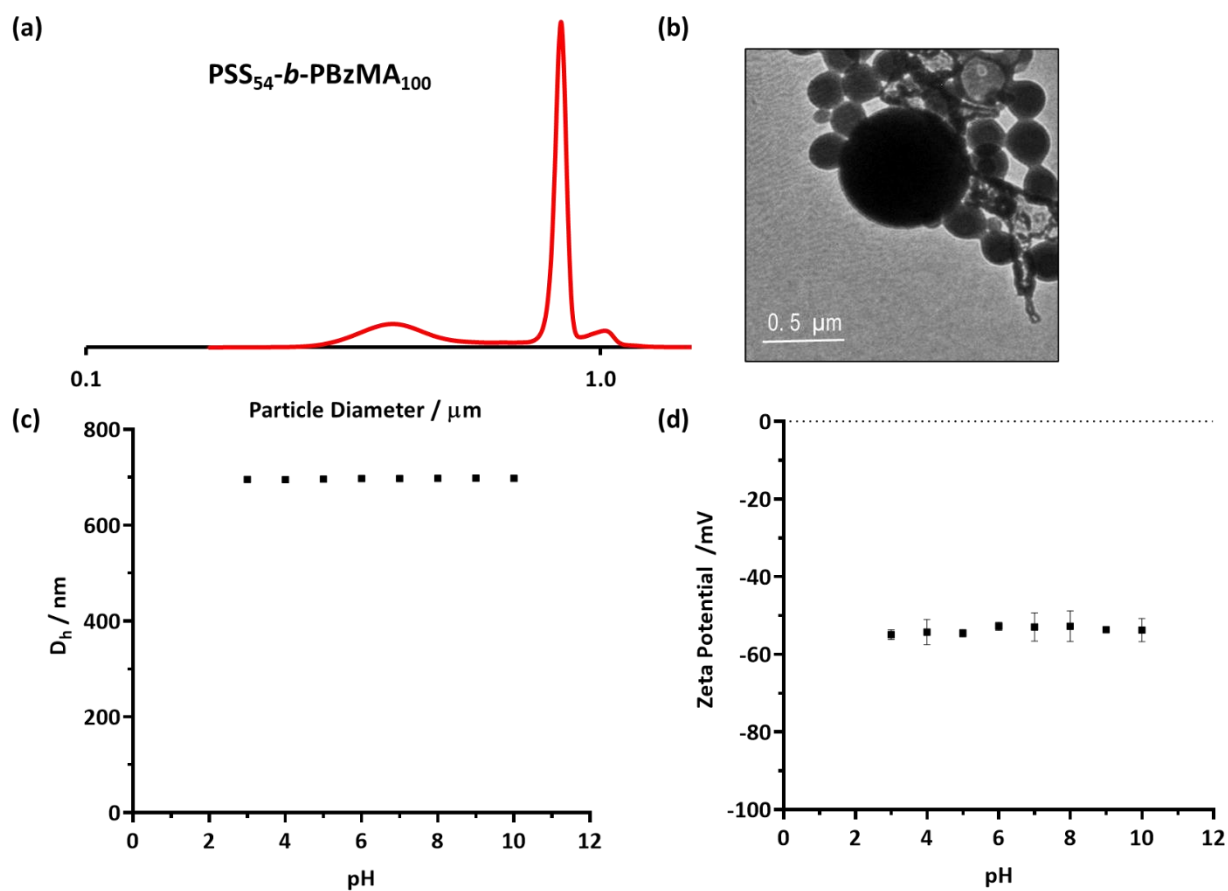

**Figure S2.** Characterisation of anionic PSS<sub>54</sub>-*b*-PBzMA<sub>100</sub> latex particles prepared by RAFT mediated PISA. (a) DCP particle size distributions were calculated using a particle density of 1.18 g cm<sup>-3</sup>. (b) Representative TEM image. (c) Mean hydrodynamic diameter and (d) zeta potential as a function of pH. Measurements were conducted at a latex concentration of approximately 0.01 % w/w with 1 mM KCl as a background electrolyte. The pH was adjusted using KOH and HCl.

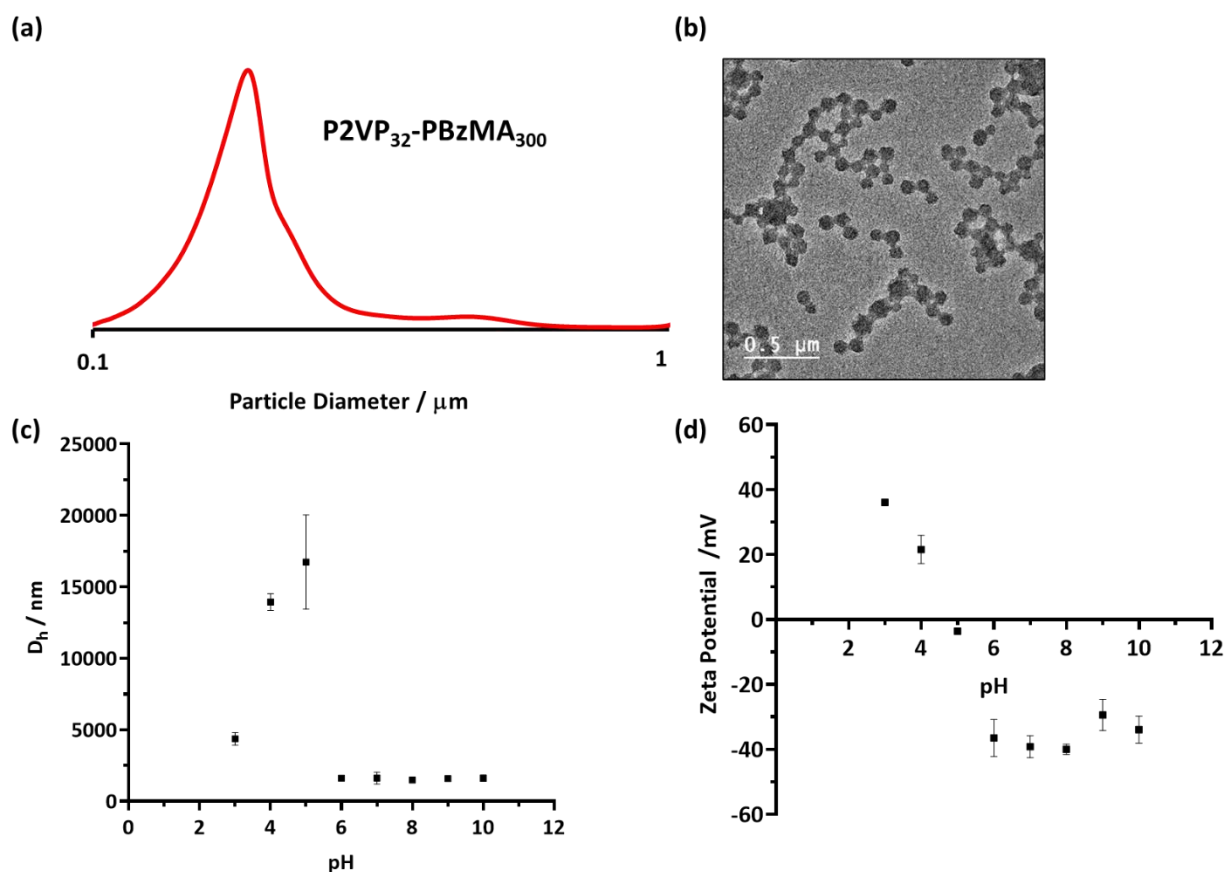

**Figure S3.** Characterisation of P2VP<sub>32</sub>-*b*-PBzMA<sub>300</sub> latexes prepared by RAFT emulsion polymerisation. (a) DCP particle size distributions were calculated using a particle density of 1.18 g cm<sup>-3</sup>. (b) Representative TEM image. (c) Mean hydrodynamic diameter and (d) zeta potential as a function of pH. Measurements were conducted at a latex concentration of approximately 0.01 % w/w with 1 mM KCl as a background electrolyte. The pH was adjusted using KOH and HCl.

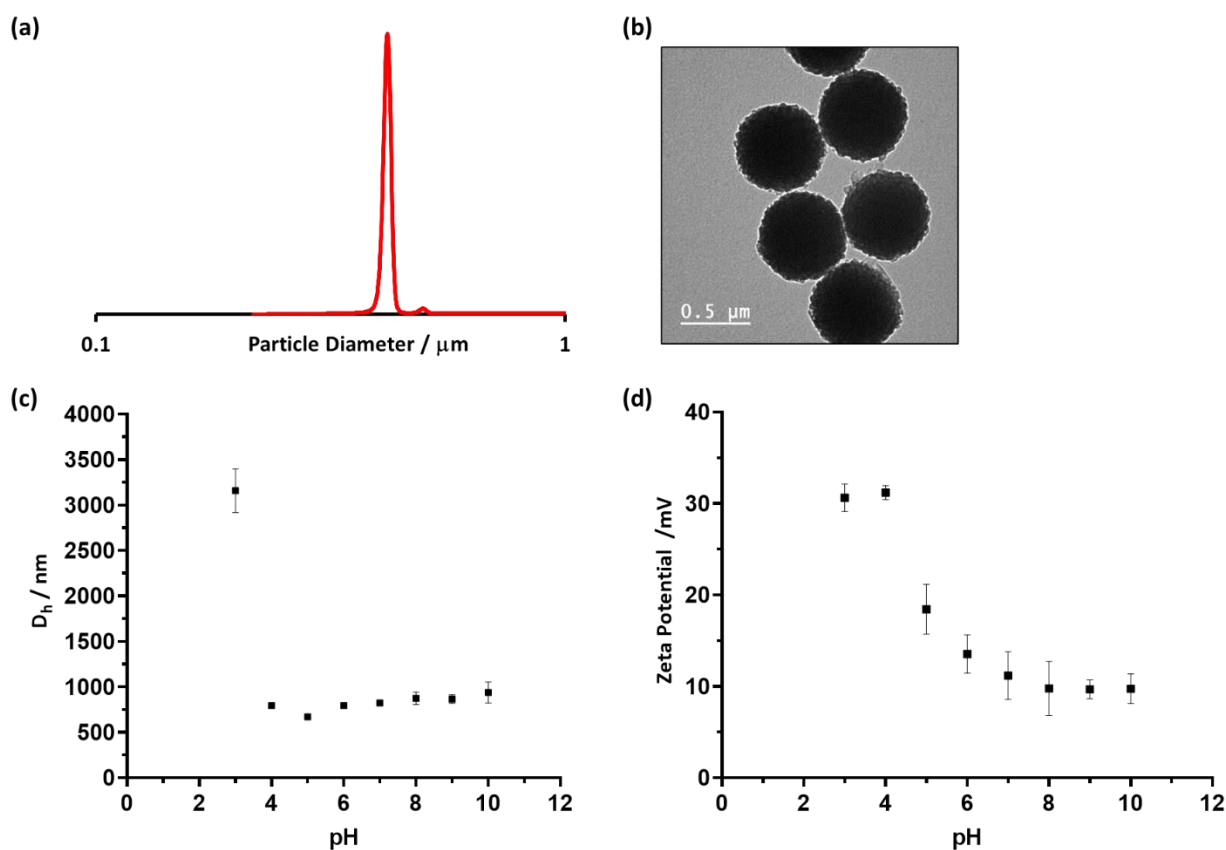

**Figure S4.** Characterisation of  $\sim 700$  nm cationic sterically-stabilised PEGMA-P2VP latex particles prepared by emulsion polymerisation. (a) DCP particle size distributions were calculated using a particle density of  $1.18 \text{ g cm}^{-3}$ . (b) Representative TEM image. (c) Mean hydrodynamic diameter and (d) zeta potential as a function of pH. Measurements were conducted at a latex concentration of approximately 0.01 % w/w with 1 mM KCl as a background electrolyte. The pH was adjusted using KOH and HCl.

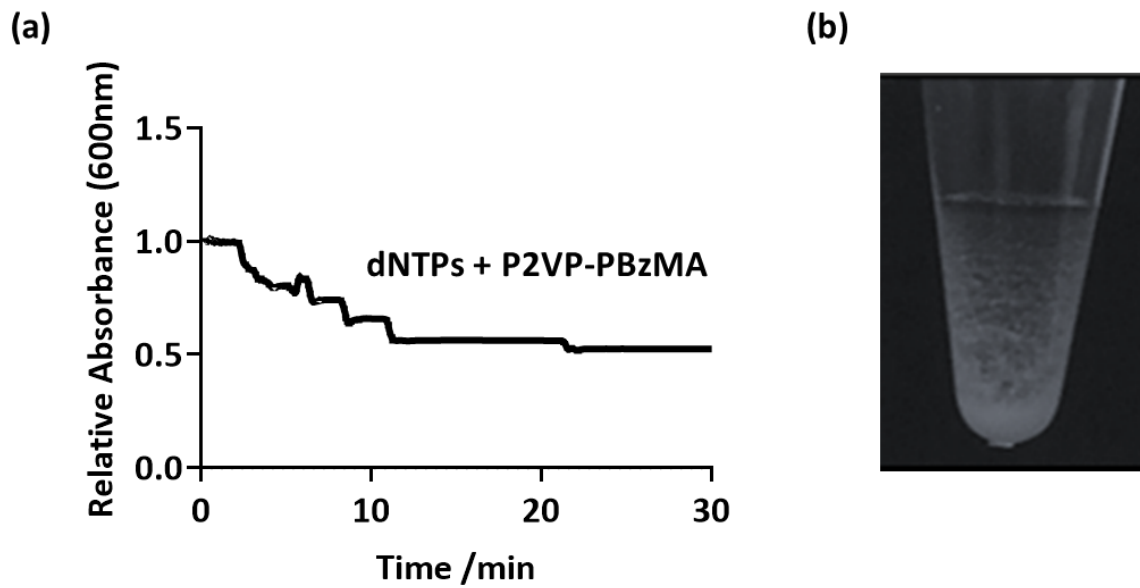

**Figure S5.** (a) UV-VIS spectrophotometry measurement showing the change in absorbance at 600 nm after the addition of dNTPs to a P2VP<sub>32</sub>-*b*-PBzMA<sub>300</sub> latex. Latex particles were at a concentration of 0.1 % w/w and dNTPs were added at the concentration used in the PCR reaction. (b) Digital image showing flocculation after the addition of dNTPs to this latex.

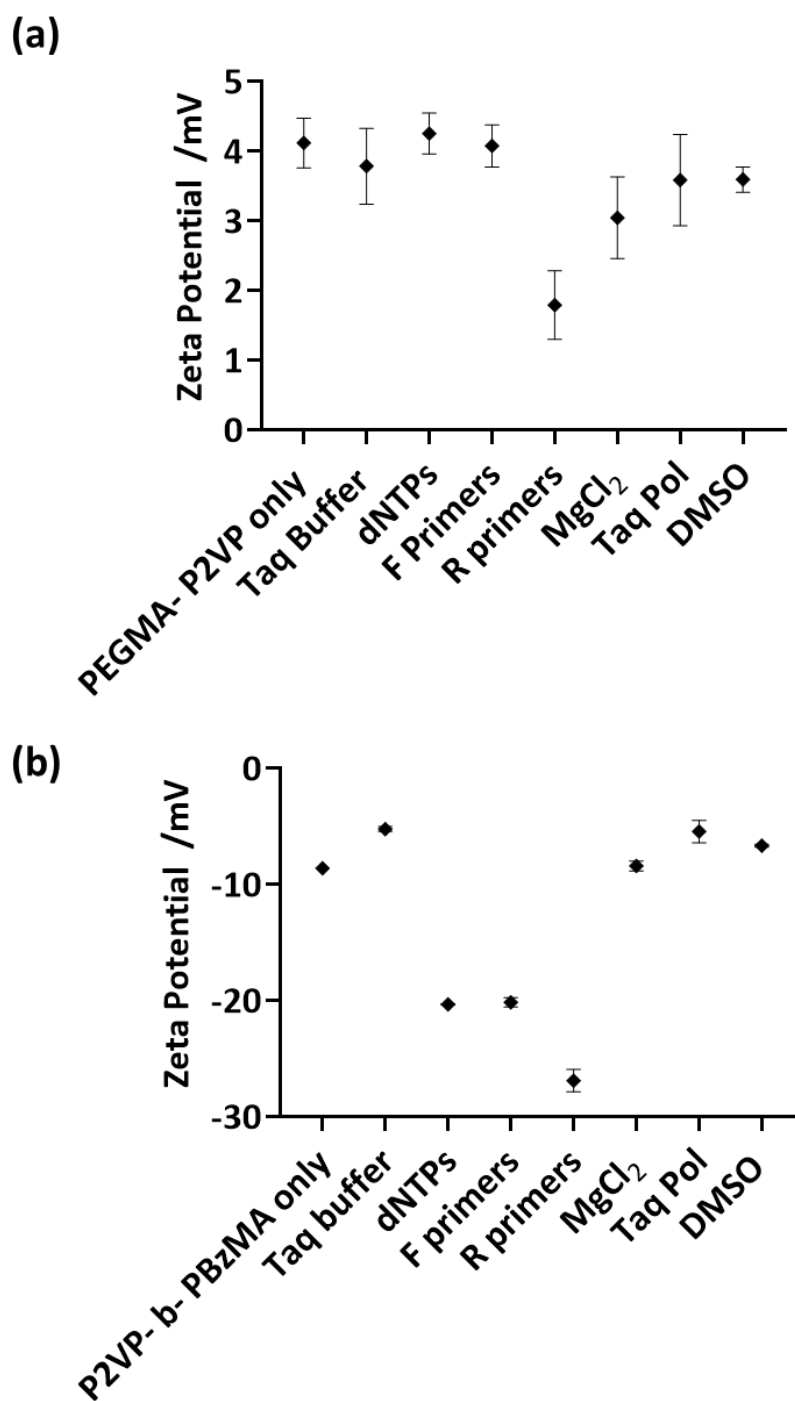

**Figure S6.** Zeta potential measured after the addition of individual PCR reagents to (a) sterically-stabilised PEGMA-P2VP (~700 nm) and (b) P2VP<sub>32</sub>-*b*-PBzMA<sub>300</sub> latexes. Measurements were conducted at a latex concentration of approximately 0.01 % w/w with 1 mM KCl as a background electrolyte. PCR reagents were added at the concentration used in typical PCR mastermix.



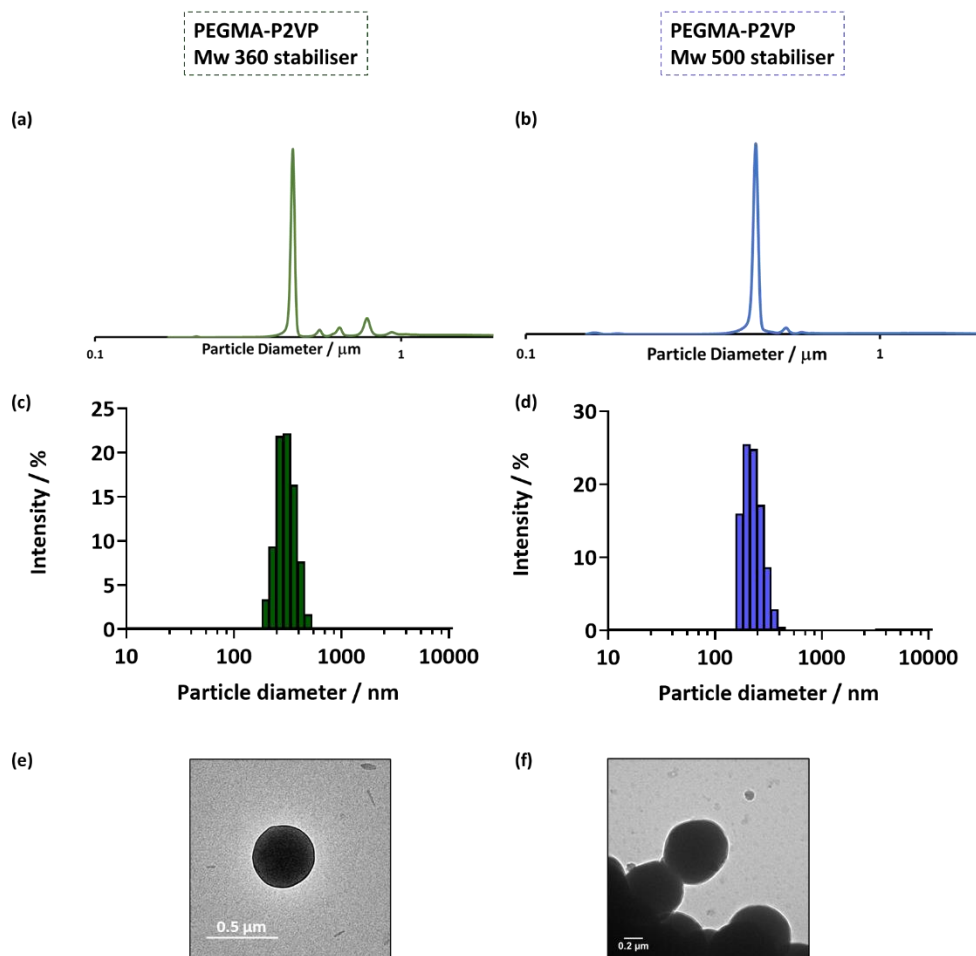

**Figure S7.** Characterisation of cationic sterically-stabilised PEGMA-P2VP latex particles prepared by emulsion polymerisation using PEGMA with an average  $M_n$  360  $\text{g mol}^{-1}$  or 500  $\text{g mol}^{-1}$ . (a-b) DCP particle size distributions were calculated using a particle density of  $1.18 \text{ g cm}^{-3}$ . (c-d) Mean hydrodynamic diameter determined using dynamic light scattering. Measurements were conducted at a latex concentration of approximately 0.01 % w/w. (e-f) Representative TEM images.

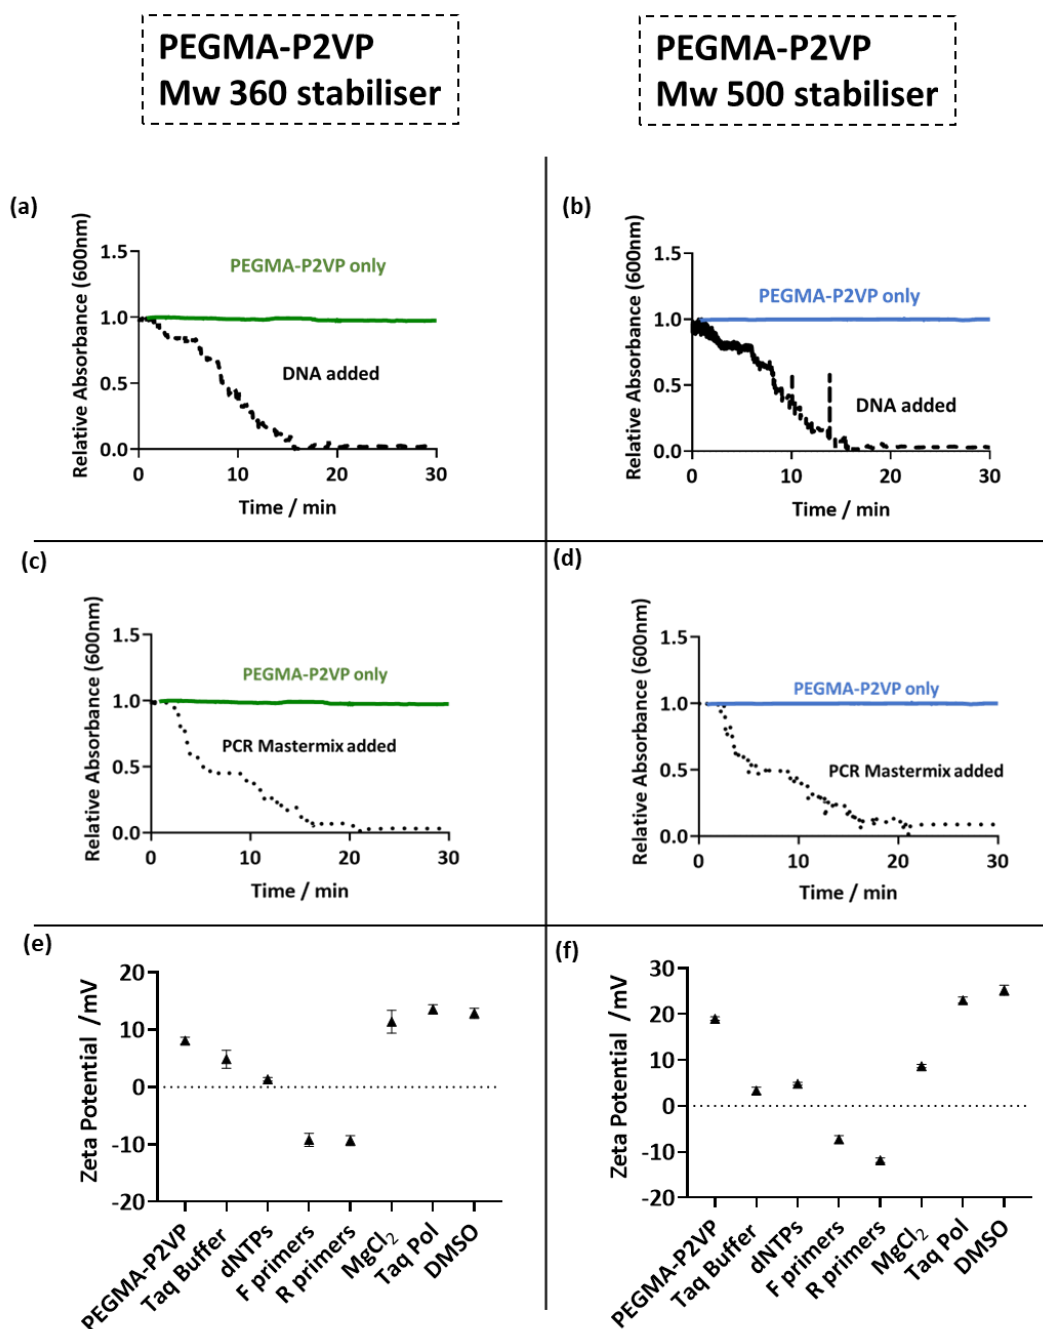

**Figure S8.** Behaviour of cationic sterically-stabilised PEGMA-P2VP latex particles prepared by emulsion polymerisation using PEGMA with an average  $M_n$  360  $\text{g mol}^{-1}$  or 500  $\text{g mol}^{-1}$ . (a and b) UV-VIS spectrophotometry measurements showing the change in absorbance at 600 nm after the addition of amplified DNA (1400 bp). Latex particles were at a concentration of 0.1 % w/w and DNA was added at a concentration of  $\sim 4 \text{ ng } \mu\text{l}^{-1}$ . (c and d) UV-VIS spectrophotometry measurements showing the change in absorbance at 600 nm after the addition of 50  $\mu\text{l}$  PCR mastermix. Latex particles were at a concentration of 0.1 % w/w and PCR mastermix was added at the concentration used in a typical PCR. (e and f) Zeta potential measured after the addition of individual PCR reagents. Latex concentration of approximately 0.1 % w/w and PCR reagents were added at the concentration used in typical PCR mastermix.

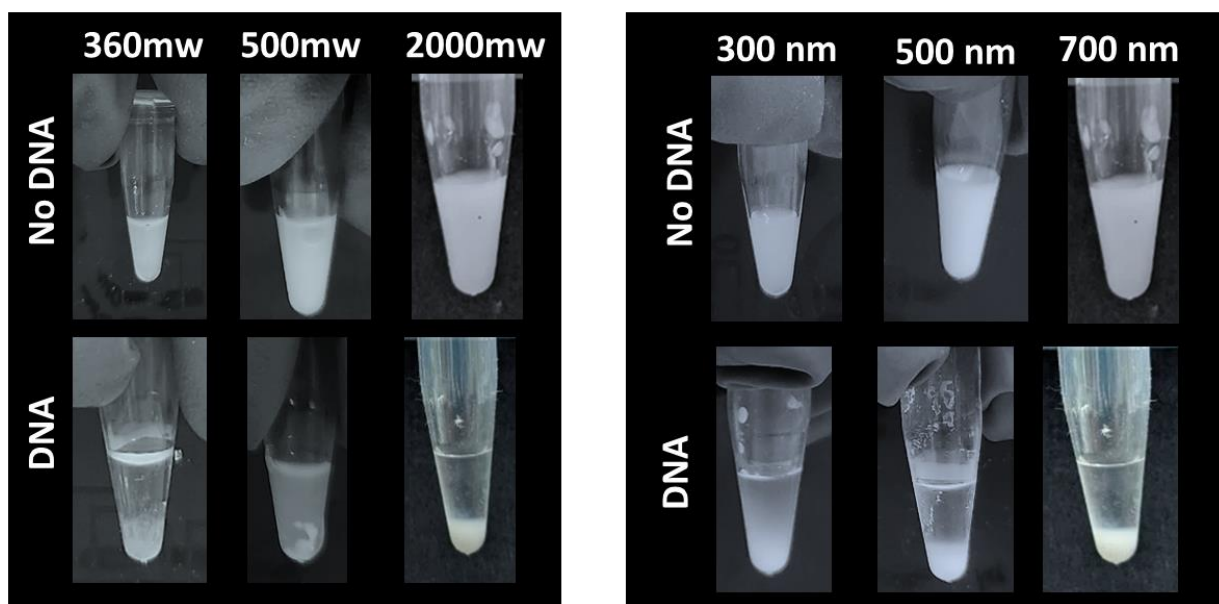

**Figure S9.** Digital images showing flocculation of PEGMA-P2VP latexes 30 minutes after the addition of amplified DNA from *P. aeruginosa* (1400 bp,  $\sim 4 \text{ ng } \mu\text{l}^{-1}$ ). Left: PEGMA-P2VP latexes prepared by using PEGMA with an average  $M_n$  360, 500 and 2000  $\text{g mol}^{-1}$ . Right: PEGMA-P2VP latexes with mean diameters between approximately 300 to 700 nm, prepared using PEGMA with  $M_n$  2000  $\text{g mol}^{-1}$ .

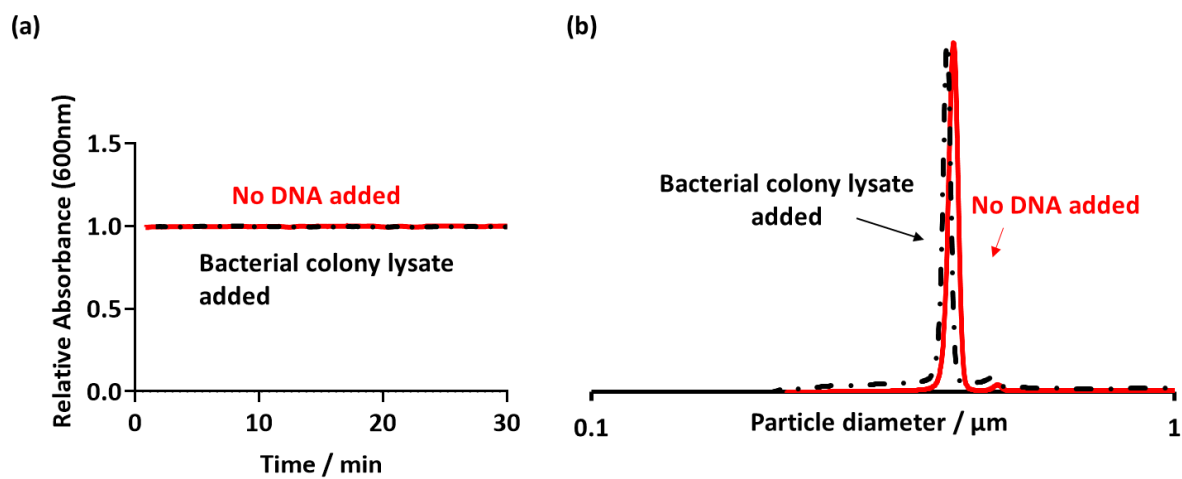

**Figure S10.** (a) UV-VIS spectrophotometry measurement showing the change in absorbance at 600 nm after the addition of bacterial colony lysate to PEGMA-P2VP latex (~700 nm diameter). (b) DCP particle size distributions for PEGMA-P2VP latex with the addition of bacterial colony lysate from *P. aeruginosa*.

(a)

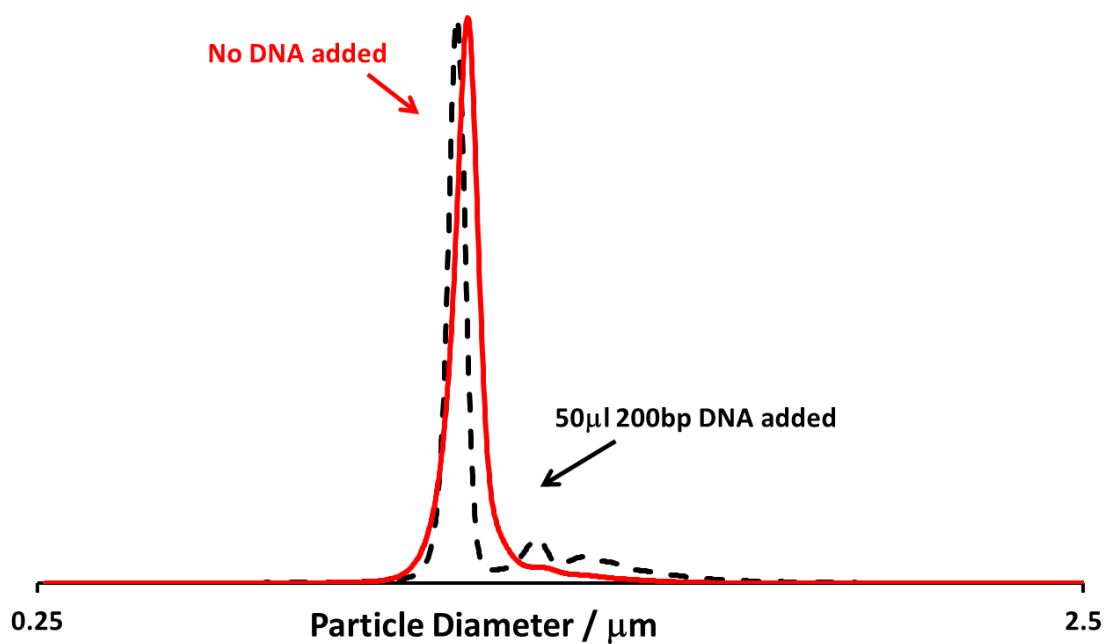

(b)

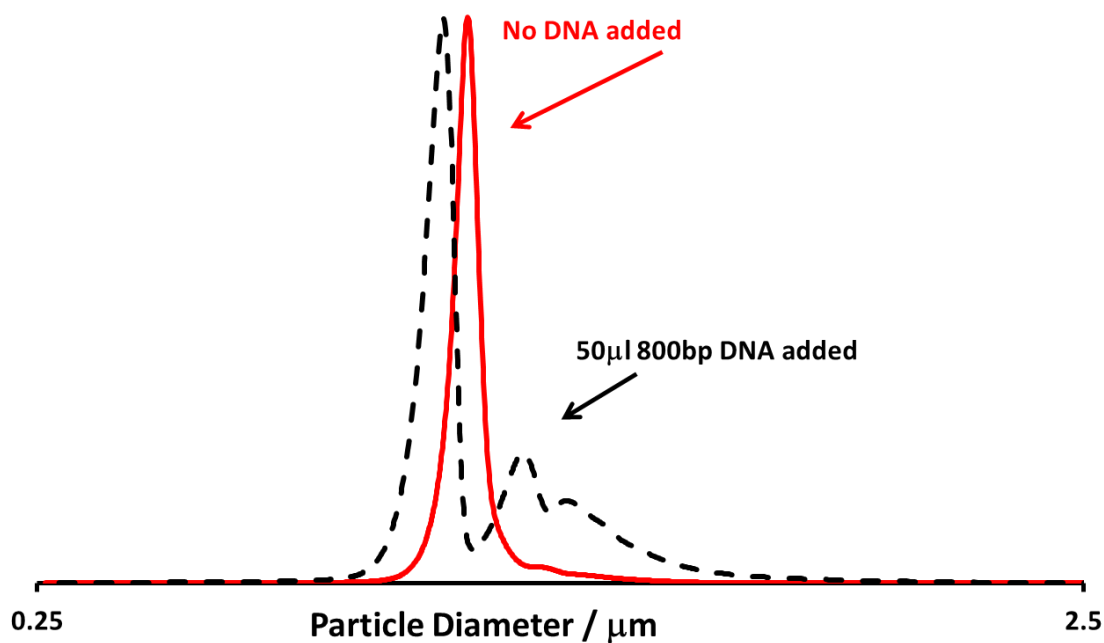

**Figure S11.** DCP particle size distributions for PEGMA-P2VP latex with the addition of amplified DNA from *P. aeruginosa* with (a) 200 bp and (b) 800 bp sequence lengths. Latex concentrations were 0.01 % w/w and an overall DNA concentration of 3 ng  $\mu\text{l}^{-1}$  was used in both cases.

## **References**

- 1 S. P. Wen, J. G. Saunders and L. A. Fielding, *Polym. Chem.*, 2020, **11**, 3416–3426.
- 2 S. P. Wen, Q. Yue and L. A. Fielding, *Polym. Chem.*, 2021, **12**, 2122–2131.
- 3 S. P. Wen and L. A. Fielding, *Soft Matter*, 2022, **18**, 1385–1394.
